# Supplementary material
Source: PubMed Central journal article supplement (PMC5084880)
Supplement: ASN.2015050570SupplementaryData.pdf [file ASN.2015050570SupplementaryData.pdf]

**Supplemental Table 1: Rates of ESRD, CKD progression and all-cause mortality specified by race/ethnicity and stratified by key clinical subgroups**

|                                                   | N    | ESRD     |                       | ESRD or 50% eGFR loss |                       | Death    |                       |
|---------------------------------------------------|------|----------|-----------------------|-----------------------|-----------------------|----------|-----------------------|
|                                                   |      | # events | Rate<br>(per 100 p-y) | # events              | Rate<br>(per 100 p-y) | # events | Rate<br>(per 100 p-y) |
| <b>eGFR &gt;= 45<br/>ml/min/1.73m<sup>2</sup></b> |      |          |                       |                       |                       |          |                       |
| Non-Hispanic White                                | 854  | 17       | 0.2                   | 62                    | 1.1                   | 71       | 1.1                   |
| Non-Hispanic Black                                | 697  | 61       | 0.8                   | 109                   | 2.3                   | 71       | 1.3                   |
| Hispanic                                          | 158  | 12       | 0.3                   | 30                    | 2.0                   | 14       | 1.1                   |
| <b>eGFR &lt; 45<br/>ml/min/1.73m<sup>2</sup></b>  |      |          |                       |                       |                       |          |                       |
| Non-Hispanic White                                | 784  | 194      | 4.3                   | 234                   | 6.6                   | 185      | 3.5                   |
| Non-Hispanic Black                                | 953  | 375      | 6.9                   | 436                   | 10.8                  | 280      | 4.3                   |
| Hispanic                                          | 339  | 147      | 7.8                   | 173                   | 12.2                  | 71       | 3.2                   |
| <b>Urine p/c &lt;= 0.5<br/>g/g</b>                |      |          |                       |                       |                       |          |                       |
| Non-Hispanic White                                | 1194 | 64       | 0.3                   | 103                   | 1.2                   | 154      | 1.6                   |
| Non-Hispanic Black                                | 983  | 90       | 0.5                   | 137                   | 1.7                   | 172      | 2.0                   |
| Hispanic                                          | 194  | 18       | 0.5                   | 22                    | 1.5                   | 24       | 1.6                   |
| <b>Urine p/c &gt; 0.5 g/g</b>                     |      |          |                       |                       |                       |          |                       |
| Non-Hispanic White                                | 402  | 143      | 6.6                   | 187                   | 11.3                  | 95       | 3.1                   |
| Non-Hispanic Black                                | 581  | 323      | 10.8                  | 379                   | 18.7                  | 157      | 3.1                   |
| Hispanic                                          | 240  | 116      | 9.2                   | 150                   | 17.7                  | 46       | 1.9                   |
| <b>DM</b>                                         |      |          |                       |                       |                       |          |                       |
| Nonhispanic white                                 | 649  | 128      | 2.8                   | 181                   | 5.6                   | 143      | 3.3                   |
| Nonhispanic black                                 | 848  | 274      | 4.6                   | 345                   | 9.4                   | 223      | 3.8                   |
| Hispanic                                          | 335  | 127      | 5.0                   | 165                   | 11.4                  | 73       | 3.0                   |
| <b>Non-DM</b>                                     |      |          |                       |                       |                       |          |                       |
| Nonhispanic white                                 | 989  | 83       | 0.6                   | 115                   | 1.4                   | 113      | 1.1                   |
| Nonhispanic black                                 | 802  | 162      | 1.3                   | 200                   | 2.8                   | 128      | 1.5                   |
| Hispanic                                          | 162  | 32       | 1.1                   | 38                    | 2.3                   | 12       | 0.9                   |
| <b>DM + Urine p/c &gt;<br/>0.5 g/g</b>            |      |          |                       |                       |                       |          |                       |
| Nonhispanic white                                 | 228  | 90       | 8.3                   | 118                   | 14.0                  | 69       | 4.6                   |
| Nonhispanic black                                 | 367  | 211      | 13.0                  | 248                   | 22.8                  | 113      | 4.3                   |
| Hispanic                                          | 183  | 95       | 11.5                  | 124                   | 23.2                  | 42       | 2.8                   |
| <b>DM + p/c &lt;= 0.5<br/>g/g</b>                 |      |          |                       |                       |                       |          |                       |
| Nonhispanic white                                 | 403  | 35       | 0.8                   | 60                    | 2.6                   | 68       | 2.4                   |
| Nonhispanic black                                 | 435  | 46       | 0.9                   | 76                    | 3.1                   | 93       | 3.0                   |
| Hispanic                                          | 109  | 12       | 0.9                   | 16                    | 2.7                   | 19       | 2.7                   |

|                                        |      |     |     |     |      |     |     |
|----------------------------------------|------|-----|-----|-----|------|-----|-----|
| <b>Non-DM + Urine p/c &gt; 0.5 g/g</b> |      |     |     |     |      |     |     |
| Nonhispanic white                      | 174  | 53  | 5.0 | 69  | 9.1  | 26  | 1.4 |
| Nonhispanic black                      | 214  | 112 | 8.9 | 131 | 15.5 | 44  | 1.9 |
| Hispanic                               | 57   | 21  | 6.1 | 26  | 10.9 | 4   | 0.6 |
| <b>Non-DM + p/c &lt;= 0.5 g/g</b>      |      |     |     |     |      |     |     |
| Nonhispanic white                      | 791  | 29  | 0.1 | 43  | 0.5  | 86  | 1.0 |
| Nonhispanic black                      | 548  | 44  | 0.3 | 61  | 0.9  | 79  | 1.4 |
| Hispanic                               | 85   | 6   | 0.3 | 6   | 0.8  | 5   | 0.7 |
| <b>Age &lt;= 55 yrs</b>                |      |     |     |     |      |     |     |
| Nonhispanic white                      | 469  | 79  | 1.8 | 108 | 3.8  | 43  | 1.1 |
| Nonhispanic black                      | 526  | 174 | 3.3 | 206 | 6.7  | 72  | 1.3 |
| Hispanic                               | 195  | 76  | 3.6 | 96  | 7.5  | 26  | 1.0 |
| <b>Age &gt; 55 yrs</b>                 |      |     |     |     |      |     |     |
| Nonhispanic white                      | 1169 | 132 | 1.2 | 188 | 2.6  | 213 | 2.6 |
| Nonhispanic black                      | 1124 | 262 | 2.2 | 339 | 4.7  | 279 | 3.2 |
| Hispanic                               | 302  | 83  | 2.2 | 107 | 4.9  | 59  | 2.3 |
| <b>Male</b>                            |      |     |     |     |      |     |     |
| Nonhispanic white                      | 982  | 150 | 2.0 | 206 | 3.9  | 190 | 2.5 |
| Nonhispanic black                      | 806  | 229 | 3.0 | 287 | 6.0  | 186 | 2.7 |
| Hispanic                               | 288  | 97  | 3.4 | 122 | 6.4  | 47  | 1.9 |
| <b>Female</b>                          |      |     |     |     |      |     |     |
| Nonhispanic white                      | 656  | 61  | 0.7 | 90  | 2.0  | 66  | 1.4 |
| Nonhispanic black                      | 844  | 207 | 1.8 | 258 | 4.4  | 165 | 2.2 |
| Hispanic                               | 209  | 62  | 1.7 | 81  | 5.0  | 38  | 1.9 |
| <b>ACE/ARB use</b>                     |      |     |     |     |      |     |     |
| Nonhispanic white                      | 1089 | 157 | 1.6 | 228 | 3.4  | 184 | 2.2 |
| Nonhispanic black                      | 1164 | 305 | 2.7 | 386 | 5.7  | 249 | 2.6 |
| Hispanic                               | 332  | 100 | 2.8 | 133 | 6.3  | 58  | 2.0 |
| <b>No ACE/ARB use</b>                  |      |     |     |     |      |     |     |
| Nonhispanic white                      | 538  | 53  | 1.1 | 65  | 2.1  | 70  | 1.8 |
| Nonhispanic black                      | 474  | 128 | 1.9 | 155 | 4.0  | 100 | 2.3 |
| Hispanic                               | 161  | 57  | 2.2 | 68  | 4.3  | 27  | 1.6 |

\*Rates are adjusted for 5 study design features (i.e., age, gender, baseline eGFR, diabetes, and clinical site)
